# Supplementary material for: N-rich porous carbons with tunable affinity for CO2 adsorption achieve size-sieving CO2/N2 selectivity in turbostratic interlayers
Source: Royal Society of Chemistry journal article supplement (doi:10.1039/d2ta05911h), 2022-01-01
Supplement: d2ta05911h1.pdf [file d2ta05911h1.pdf]

**Supporting Information for N-Rich Porous Carbons with Tunable Affinity for CO<sub>2</sub> Adsorption Achieve Size-Sieving Selectivity in Turbostratic Interlayers**

*James N. Burrow, J. Ehren Eichler, Yu Wang, David C. Calabro, and C. Buddie Mullins\**

J. N. Burrow, Prof. C. B. Mullins

John J. McKetta Department of Chemical Engineering, The University of Texas at Austin,  
Austin, Texas 78712, United States

E-mail: mullins@che.utexas.edu

J. E. Eichler, Prof. C. B. Mullins

Department of Chemistry, The University of Texas at Austin, Austin, Texas 78712, United States

Dr. Y. Wang, Dr. D. C. Calabro

Corporate Strategic Research, ExxonMobil Research and Engineering Company,  
Annandale, New Jersey 08801, United States

Prof. C. B. Mullins

Texas Materials Institute, The University of Texas at Austin, Austin, Texas 78712, United States

Summary: additional characterization and analysis details related to material properties, isotherm models, selectivity, and process performance

## Table of Contents

|                                                                              |      |
|------------------------------------------------------------------------------|------|
| 1. Supporting Data and Figures                                               |      |
| 1.1 Table S1. Summary of physicochemical properties                          | S-3  |
| 1.2 Table S2. Summary of detailed XPS characterization                       | S-4  |
| 1.3 Figure S1. Relationship between surface area and heteroatom content      | S-5  |
| 1.4 Figure S2. Relationship between N content and d-spacing                  | S-6  |
| 1.5 Figure S3. Variable temperature CO <sub>2</sub> isotherms (PYRO)         | S-7  |
| 1.6 Figure S4. Variable temperature CO <sub>2</sub> isotherms (OX-0.5)       | S-8  |
| 1.7 Figure S5. Variable temperature CO <sub>2</sub> isotherms (OX-1)         | S-9  |
| 1.8 Table S3. Dual site Langmuir parameters and statistics                   | S-10 |
| 1.9 Table S4. Henry's constants and selectivity                              | S-11 |
| 1.10 Figure S6. Relationship between Henry's constants                       | S-12 |
| 1.11 Figure S7. Isothermic heats of CO <sub>2</sub> adsorption (PYRO)        | S-13 |
| 1.12 Figure S8. Isothermic heats of CO <sub>2</sub> adsorption (OX-0.5)      | S-14 |
| 1.13 Figure S9. Isothermic heats of CO <sub>2</sub> adsorption (OX-1)        | S-15 |
| 1.14 Figure S10. Relationship between N content, $\Delta H_A$ , $\Delta S_A$ | S-16 |
| 1.15 Figure S11. Relationship between N content, $\Delta H_B$ , $\Delta S_B$ | S-17 |
| 1.16 Figure S12. Relationship between specific N motifs and $\Delta H$       | S-18 |
| 1.17 Figure S13. IAST summary                                                | S-19 |
| 1.18 Figure S14. Zoomed in purity plot                                       | S-20 |
| 1.19 Figure S15. TSA model plots as function of regen. temperature           | S-21 |
| 1.20 Figure S16. Plots of achievable performance in TSA model                | S-22 |
| 1.21 Figure S17. BET analysis with CO <sub>2</sub> as probe molecule         | S-23 |

The Python scripts required for batch processing of IAST selectivity and TSA estimation can be found on Github here:

<https://github.com/jeeichler/AdsorptionAnalysis>

**Table S1.** Summary of physicochemical properties of the SMx carbons.

|             | BET<br>(m <sup>2</sup> /g) | V <sub>pore</sub> <1nm<br>(cc/g) | V <sub>pore</sub> <2nm<br>(cc/g) | V <sub>pore</sub> <200nm<br>(cc/g) | C 1s<br>(at%) | N 1s<br>(at%) | O 1s<br>(at%) | XPS<br>N/C | CHN<br>EA N/C | 002<br>Peak (°) | d <sub>002</sub><br>(Å) | FWHM<br>(°) | L <sub>c</sub><br>(Å) |
|-------------|----------------------------|----------------------------------|----------------------------------|------------------------------------|---------------|---------------|---------------|------------|---------------|-----------------|-------------------------|-------------|-----------------------|
| SM0-PYRO    | 0.8                        | --                               | --                               | --                                 | 96.0          | 0.0           | 4.0           | 0          | 0             | 22.40           | 3.97                    | 10.81       | 7.41                  |
| SM20-PYRO   | 4.9                        | --                               | --                               | --                                 | 81.0          | 16.9          | 2.2           | 0.20       | 0.21          | 25.04           | 3.56                    | 9.50        | 8.48                  |
| SM40-PYRO   | 1.3                        | --                               | --                               | --                                 | 77.4          | 19.0          | 3.6           | 0.25       | 0.29          | 25.39           | 3.51                    | 9.32        | 8.65                  |
| SM60-PYRO   | 2.9                        | --                               | --                               | --                                 | 76.0          | 20.3          | 3.7           | 0.27       | 0.35          | 25.68           | 3.47                    | 7.65        | 10.5                  |
| SM80-PYRO   | 40                         | --                               | --                               | --                                 | 75.1          | 21.5          | 3.4           | 0.29       | 0.34          | 25.45           | 3.50                    | 7.79        | 10.4                  |
| SM0-OX-0.5  | 857                        | 0.29                             | 0.30                             | 0.38                               | 81.8          | 0.0           | 18.2          | 0          | 0             | 20.21           | 4.39                    | 17.59       | 4.54                  |
| SM10-OX-0.5 | 1570                       | 0.41                             | 0.52                             | 0.62                               | 86.5          | 7.2           | 6.4           | 0.08       | 0.08          | 22.86           | 3.89                    | 17.41       | 4.61                  |
| SM20-OX-0.5 | 1210                       | 0.27                             | 0.38                             | 0.54                               | 82.6          | 12.0          | 5.4           | 0.15       | 0.17          | 24.56           | 3.62                    | 11.08       | 7.26                  |
| SM30-OX-0.5 | 1130                       | 0.27                             | 0.35                             | 0.52                               | 81.4          | 13.7          | 4.9           | 0.17       | 0.18          | 25.01           | 3.56                    | 9.69        | 8.31                  |
| SM40-OX-0.5 | 816                        | 0.20                             | 0.26                             | 0.34                               | 79.0          | 16.8          | 4.2           | 0.21       | 0.23          | 25.39           | 3.51                    | 8.27        | 9.75                  |
| SM50-OX-0.5 | 842                        | 0.22                             | 0.28                             | 0.34                               | 78.3          | 16.0          | 5.7           | 0.20       | 0.24          | 25.64           | 3.47                    | 7.31        | 11.0                  |
| SM60-OX-0.5 | 725                        | 0.17                             | 0.23                             | 0.32                               | 75.4          | 18.8          | 5.8           | 0.25       | 0.36          | 26.46           | 3.37                    | 4.11        | 19.7                  |
| SM70-OX-0.5 | 601                        | 0.16                             | 0.20                             | 0.28                               | 74.7          | 19.3          | 6.0           | 0.26       | 0.38          | 26.78           | 3.33                    | 3.34        | 24.2                  |
| SM80-OX-0.5 | 528                        | 0.15                             | 0.18                             | 0.27                               | 73.7          | 22.1          | 4.2           | 0.30       | 0.41          | 26.85           | 3.32                    | 3.00        | 26.9                  |
| SM0-OX-1    | 943                        | 0.32                             | 0.33                             | 0.42                               | 84.0          | 0.0           | 16.0          | 0          | 0             | 19.84           | 4.47                    | 21.64       | 3.69                  |
| SM10-OX-1   | 2500                       | 0.48                             | 0.72                             | 1.06                               | 89.1          | 1.6           | 9.3           | 0.02       | 0             | 19.19           | 4.62                    | 23.39       | 3.41                  |
| SM20-OX-1   | 2740                       | 0.37                             | 0.69                             | 1.33                               | 88.3          | 5.7           | 6.0           | 0.06       | 0.07          | 20.48           | 4.34                    | 20.56       | 3.89                  |
| SM30-OX-1   | 2660                       | 0.35                             | 0.64                             | 1.39                               | 87.4          | 9.0           | 3.6           | 0.10       | 0.12          | 22.58           | 3.94                    | 20.23       | 3.96                  |
| SM40-OX-1   | 2040                       | 0.31                             | 0.56                             | 1.06                               | 84.7          | 12.0          | 3.4           | 0.14       | 0.16          | 23.88           | 3.73                    | 14.11       | 5.70                  |
| SM50-OX-1   | 1580                       | 0.24                             | 0.37                             | 0.87                               | 86.2          | 9.9           | 3.8           | 0.12       | 0.18          | 23.42           | 3.80                    | 13.06       | 6.15                  |
| SM60-OX-1   | 834                        | 0.16                             | 0.25                             | 0.45                               | 79.1          | 17.0          | 3.9           | 0.28       | 0.28          | 26.18           | 3.40                    | 5.90        | 13.7                  |
| SM70-OX-1   | 754                        | 0.13                             | 0.22                             | 0.47                               | 78.2          | 15.9          | 5.9           | 0.20       | 0.36          | 26.75           | 3.33                    | 3.23        | 25.0                  |
| SM80-OX-1   | 670                        | 0.13                             | 0.21                             | 0.41                               | 75.8          | 19.7          | 4.5           | 0.26       | 0.39          | 26.80           | 3.33                    | 2.95        | 27.4                  |

**Table S2.** Detailed surface chemistry of the SMx carbons as determined by XPS.

|             | C=C<br>(at%) | C-N/<br>C-C<br>(at%) | CN <sub>3</sub> /<br>COH<br>(at%) | CO<br>(at%) | C-N=C<br>(at%) | C <sub>2</sub> NH<br>(at%) | NC <sub>3</sub><br>(at%) | NO <sub>x</sub><br>(at%) | CO/<br>NO<br>(at%) | OH<br>(at%) |
|-------------|--------------|----------------------|-----------------------------------|-------------|----------------|----------------------------|--------------------------|--------------------------|--------------------|-------------|
| SM0-PYRO    | 69.1         | 18.2                 | 5.8                               | 2.9         | 0.0            | 0.0                        | 0.0                      | 0.0                      | 2.8                | 2.4         |
| SM20-PYRO   | 29.9         | 38.9                 | 9.3                               | 2.9         | 6.5            | 2.8                        | 4.8                      | 2.8                      | 2.4                | 1.2         |
| SM40-PYRO   | 23.6         | 41.9                 | 8.9                               | 2.9         | 9.0            | 3.2                        | 5.6                      | 1.2                      | 3.1                | 0.5         |
| SM60-PYRO   | 25.8         | 39.2                 | 8.5                               | 2.5         | 9.7            | 3.5                        | 5.8                      | 1.3                      | 3.0                | 0.8         |
| SM80-PYRO   | 25.2         | 36.7                 | 9.8                               | 3.5         | 9.9            | 3.9                        | 6.1                      | 1.5                      | 2.4                | 1.1         |
| SM0-OX-0.5  | 59.9         | 15.4                 | 0.0                               | 6.5         | 0.0            | 0.0                        | 0.0                      | 0.0                      | 4.8                | 14.3        |
| SM10-OX-0.5 | 39.4         | 33.6                 | 9.1                               | 4.4         | 2.6            | 2.8                        | 1.1                      | 0.7                      | 3.5                | 2.7         |
| SM20-OX-0.5 | 33.0         | 36.5                 | 9.1                               | 4.0         | 5.1            | 3.8                        | 2.1                      | 1.0                      | 2.4                | 3.0         |
| SM30-OX-0.5 | 32.0         | 36.8                 | 8.6                               | 4.0         | 6.2            | 4.6                        | 1.9                      | 1.1                      | 2.3                | 2.6         |
| SM40-OX-0.5 | 29.8         | 40.6                 | 6.7                               | 2.0         | 8.3            | 5.4                        | 2.1                      | 1.0                      | 1.4                | 2.8         |
| SM50-OX-0.5 | 34.9         | 33.0                 | 7.9                               | 2.5         | 8.0            | 5.2                        | 1.7                      | 1.2                      | 3.0                | 2.8         |
| SM60-OX-0.5 | 27.8         | 39.6                 | 6.0                               | 2.0         | 9.6            | 6.1                        | 1.8                      | 1.3                      | 2.1                | 3.6         |
| SM70-OX-0.5 | 26.6         | 40.6                 | 5.5                               | 2.1         | 10.4           | 5.3                        | 2.1                      | 1.5                      | 2.6                | 3.4         |
| SM80-OX-0.5 | 24.4         | 41.6                 | 5.6                               | 2.2         | 12.2           | 6.4                        | 2.3                      | 1.2                      | 1.4                | 2.8         |
| SM0-OX-1    | 63.0         | 16.8                 | 0.0                               | 4.2         | 0.0            | 0.0                        | 0.0                      | 0.0                      | 6.2                | 9.8         |
| SM10-OX-1   | 46.0         | 30.5                 | 9.2                               | 3.4         | 0.2            | 0.7                        | 0.4                      | 0.3                      | 5.7                | 3.6         |
| SM20-OX-1   | 38.8         | 33.9                 | 10.0                              | 5.6         | 1.8            | 2.5                        | 0.8                      | 0.6                      | 2.3                | 3.7         |
| SM30-OX-1   | 34.9         | 35.9                 | 10.3                              | 6.3         | 3.4            | 3.0                        | 1.4                      | 1.2                      | 1.5                | 1.8         |
| SM40-OX-1   | 46.1         | 22.7                 | 11.2                              | 4.7         | 5.2            | 3.9                        | 2.0                      | 0.8                      | 1.7                | 1.7         |
| SM50-OX-1   | 34.4         | 38.7                 | 8.9                               | 4.2         | 4.1            | 3.1                        | 1.5                      | 1.1                      | 2.1                | 1.7         |
| SM60-OX-1   | 24.5         | 45.1                 | 7.0                               | 2.5         | 8.9            | 5.4                        | 1.8                      | 0.9                      | 1.7                | 2.2         |
| SM70-OX-1   | 26.2         | 41.8                 | 7.4                               | 2.8         | 8.4            | 4.9                        | 2.0                      | 0.6                      | 2.8                | 3.1         |
| SM80-OX-1   | 27.8         | 41.2                 | 5.0                               | 1.9         | 11.4           | 5.4                        | 2.4                      | 0.5                      | 1.5                | 3.0         |

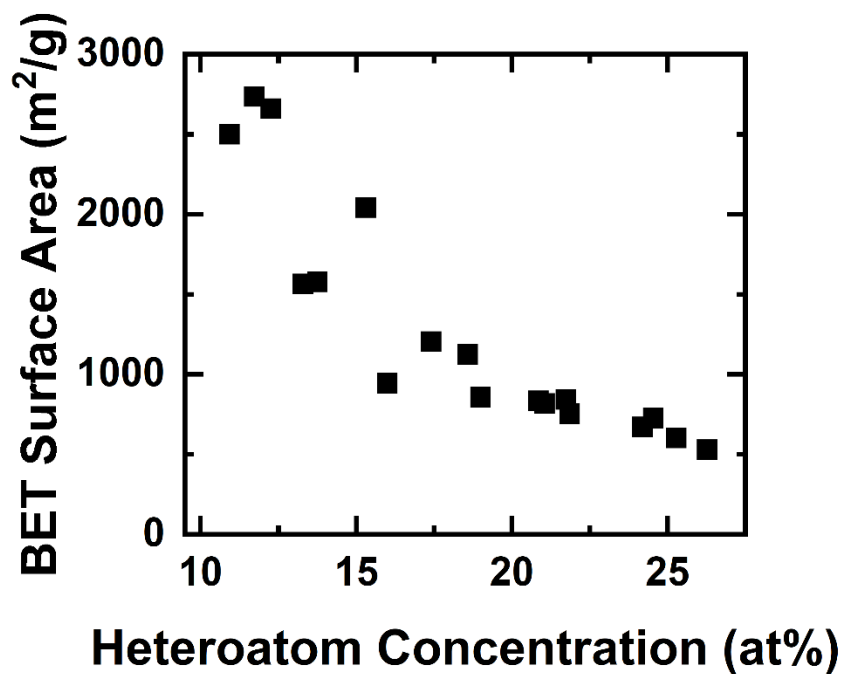

**Figure S1.** As heteroatom (N and O) content increased, surface area and porosity decreased.

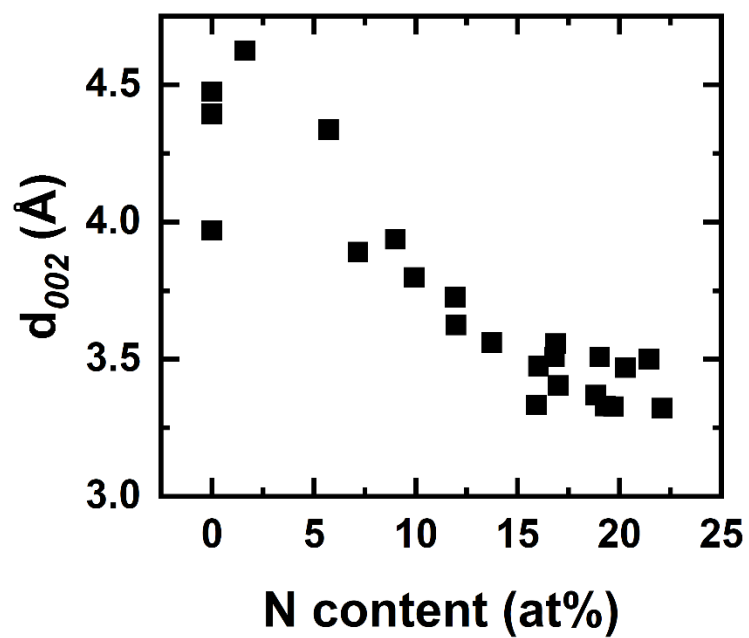

**Figure S2.** The average interlayer spacing of the turbostratic carbons was a strong function of N content.

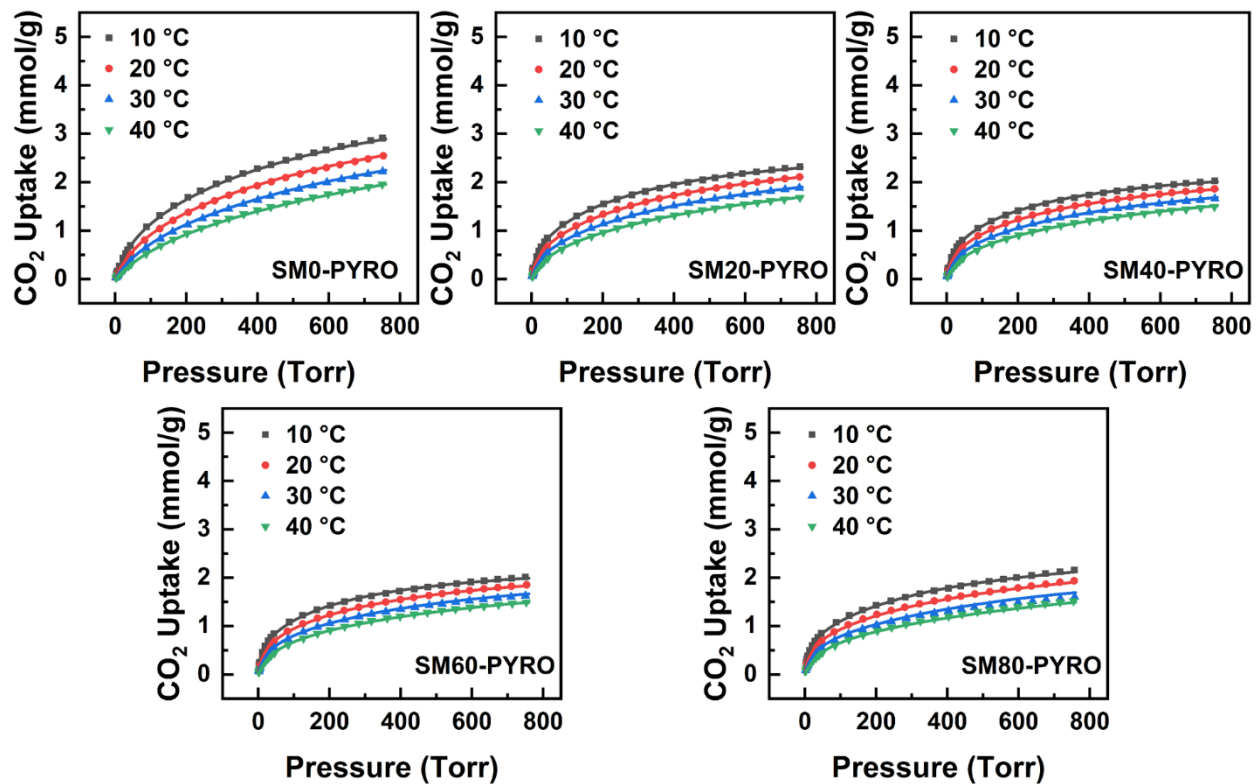

**Figure S3.** Variable temperature CO<sub>2</sub> isotherms of pyrolyzed samples, with raw data (symbols) and dual-site Langmuir fits (lines).

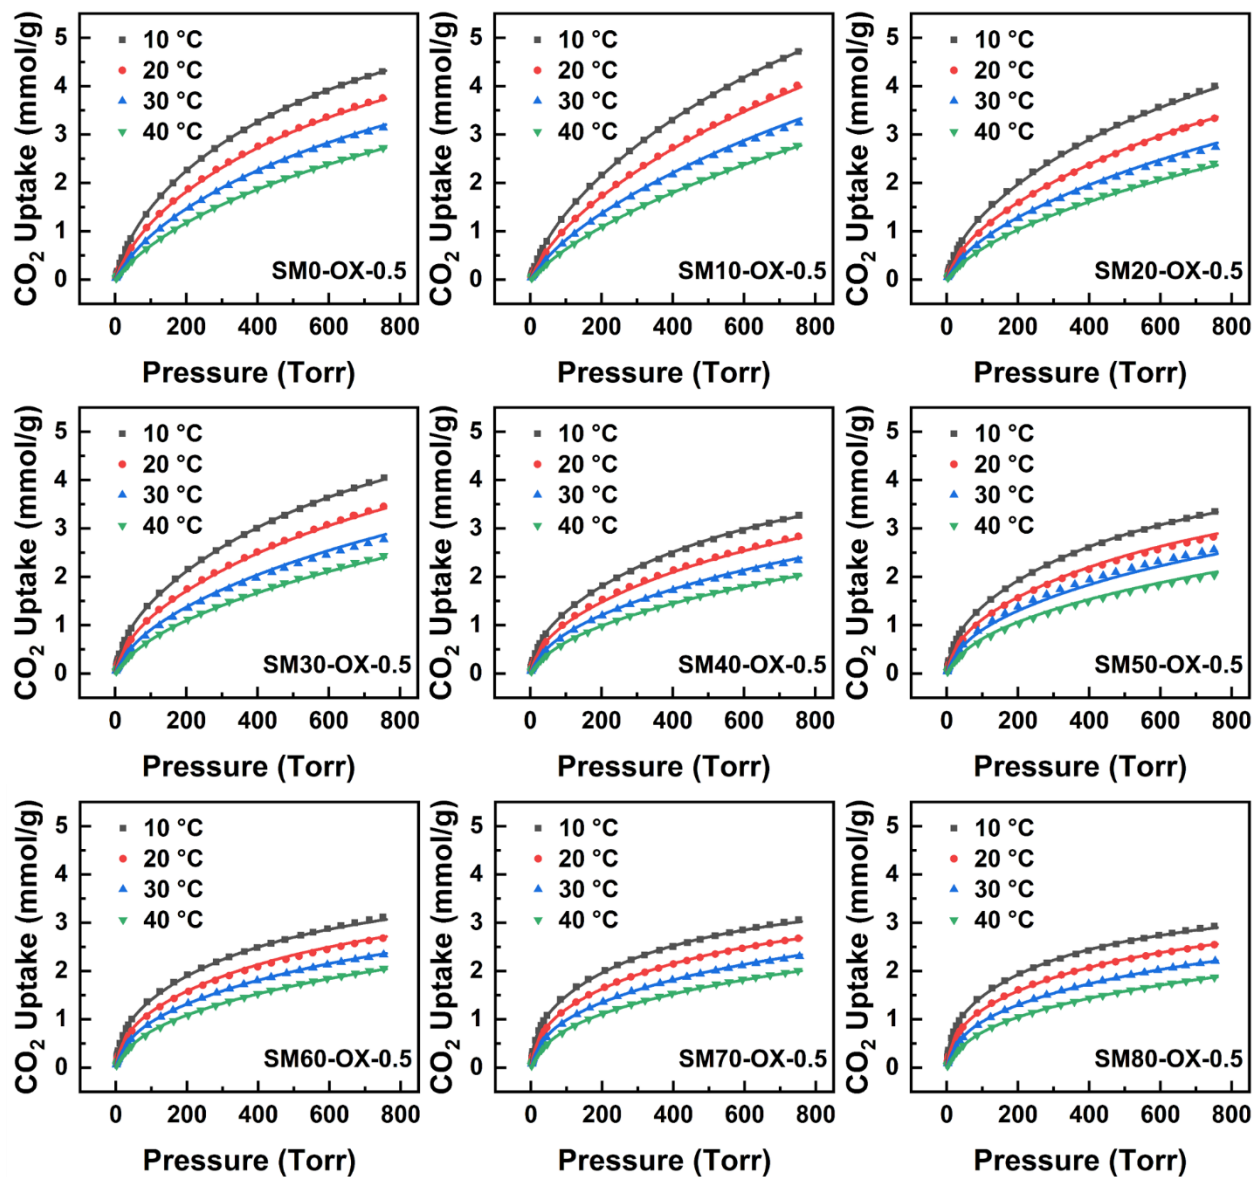

**Figure S4.** Variable temperature CO<sub>2</sub> isotherms of the OX-0.5 activated samples, with raw data (symbols) and dual-site Langmuir fits (lines).



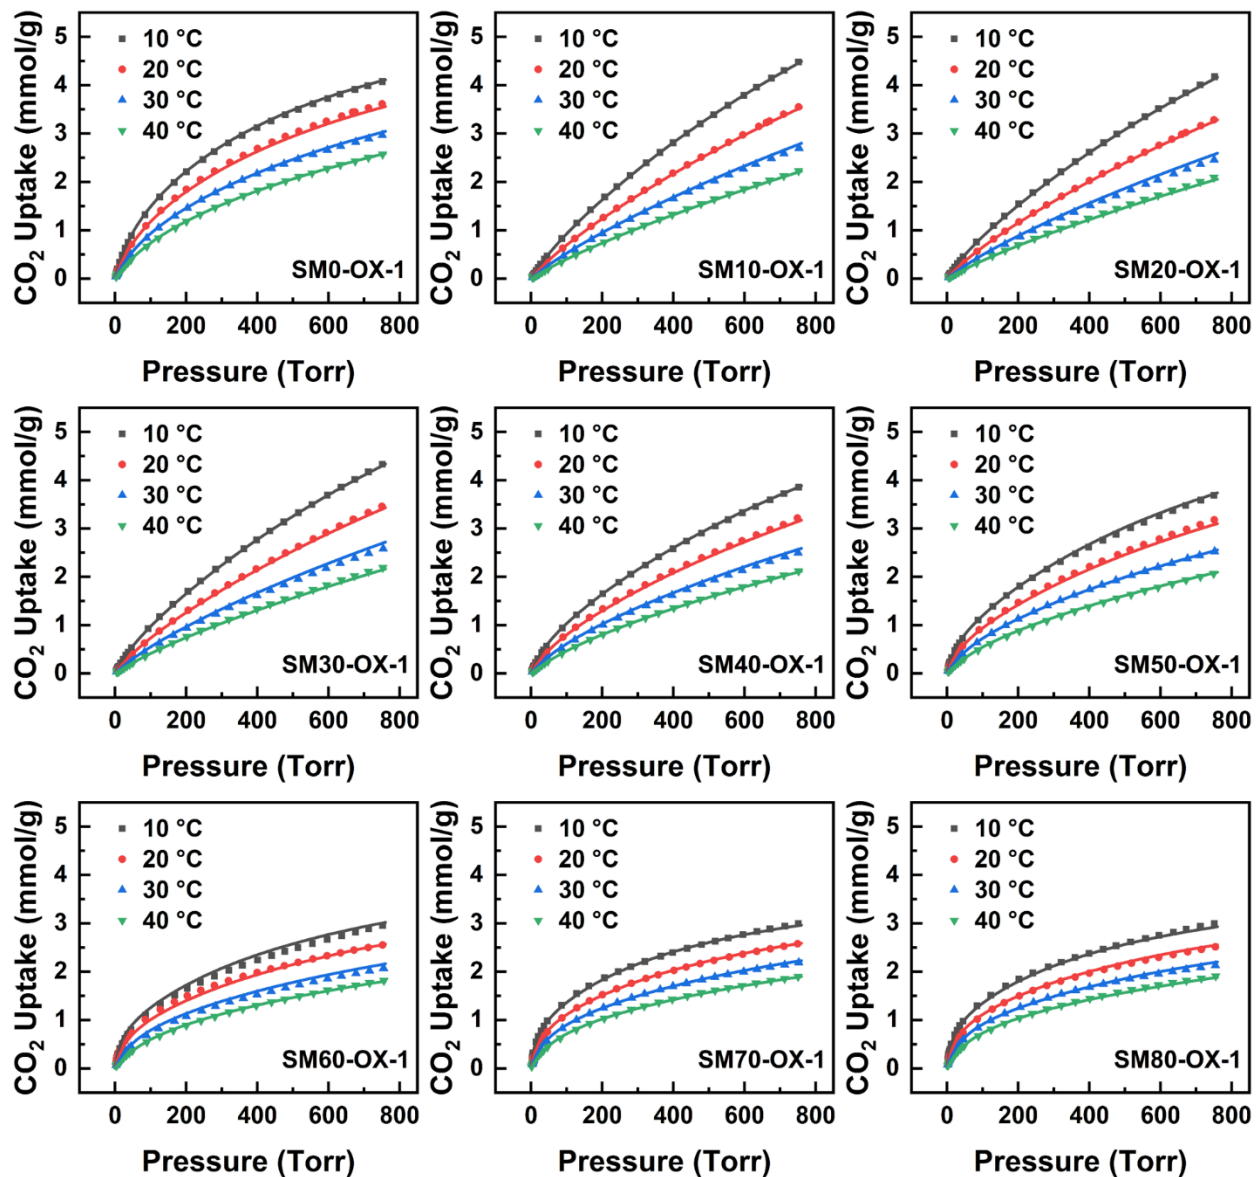

**Figure S5.** Variable temperature CO<sub>2</sub> isotherms of the OX-1 activated samples, with raw data (symbols) and dual-site Langmuir fits (lines).

**Table S3.** Temperature-dependent dual site Langmuir fits and statistics for CO<sub>2</sub> adsorption.

|             | $q_A^{sat}$<br>(mmol/g) | $q_B^{sat}$<br>(mmol/g) | $\Delta H_A$<br>(kJ/mol) | $\Delta S_A$<br>(J/mol K) | $\Delta H_B$<br>(kJ/mol) | $\Delta S_B$<br>(J/mol K) | Adj. R <sup>2</sup> |
|-------------|-------------------------|-------------------------|--------------------------|---------------------------|--------------------------|---------------------------|---------------------|
| SM0-PYRO    | 0.87 ±0.02              | 3.70 ±0.02              | -29.00 ±1.53             | -52.18 ±5.16              | -20.41 ±0.79             | -44.04 ±2.67              | 0.99997             |
| SM20-PYRO   | 0.65 ±0.02              | 2.31 ±0.01              | -36.71 ±0.47             | -67.17 ±1.57              | -23.53 ±0.14             | -49.29 ±0.45              | 0.99980             |
| SM40-PYRO   | 0.63 ±0.02              | 1.87 ±0.01              | -35.01 ±0.54             | -60.36 ±1.80              | -24.83 ±0.55             | -52.60 ±1.83              | 0.99971             |
| SM60-PYRO   | 0.66 ±0.02              | 1.79 ±0.01              | -36.62 ±0.24             | -65.05 ±0.81              | -25.92 ±1.23             | -56.38 ±4.14              | 0.99964             |
| SM80-PYRO   | 0.71 ±0.02              | 2.12 ±0.03              | -37.70 ±0.35             | -69.62 ±1.17              | -26.14 ±3.43             | -60.32 ±11.52             | 0.99937             |
| SM0-OX-0.5  | 0.93 ±0.03              | 6.42 ±0.02              | -28.67 ±0.75             | -51.80 ±2.52              | -21.28 ±0.77             | -47.83 ±2.58              | 0.99999             |
| SM10-OX-0.5 | 0.81 ±0.03              | 9.89 ±0.12              | -33.18 ±0.96             | -67.21 ±3.22              | -19.57 ±1.03             | -46.30 ±3.46              | 0.99997             |
| SM20-OX-0.5 | 0.80 ±0.02              | 7.01 ±0.08              | -34.15 ±1.50             | -66.79 ±5.03              | -21.61 ±1.43             | -51.63 ±4.82              | 0.99993             |
| SM30-OX-0.5 | 0.87 ±0.02              | 6.33 ±0.07              | -37.56 ±0.67             | -76.92 ±2.24              | -23.46 ±1.63             | -56.67 ±5.47              | 0.99991             |
| SM40-OX-0.5 | 0.76 ±0.02              | 4.64 ±0.05              | -36.32 ±2.24             | -70.75 ±7.55              | -23.76 ±1.16             | -56.40 ±3.91              | 0.99985             |
| SM50-OX-0.5 | 0.84 ±0.02              | 4.36 ±0.04              | -35.09 ±2.89             | -65.15 ±9.73              | -25.43 ±2.60             | -60.54 ±8.76              | 0.99988             |
| SM60-OX-0.5 | 0.83 ±0.02              | 3.60 ±0.03              | -39.36 ±1.34             | -78.16 ±4.50              | -25.21 ±1.07             | -58.44 ±3.61              | 0.99976             |
| SM70-OX-0.5 | 0.89 ±0.02              | 3.20 ±0.02              | -40.61 ±0.56             | -81.66 ±1.89              | -28.30 ±0.56             | -67.89 ±1.89              | 0.99976             |
| SM80-OX-0.5 | 0.89 ±0.02              | 2.93 ±0.02              | -46.99 ±1.23             | -103.10 ±4.21             | -30.85 ±0.24             | -76.32 ±0.83              | 0.99975             |
| SM0-OX-1    | 0.95 ±0.03              | 5.76 ±0.03              | -24.52 ±1.49             | -36.38 ±5.01              | -23.11 ±1.39             | -53.56 ±4.69              | 0.99996             |
| SM10-OX-1   | 0.34 ±0.03              | 15.40 ±0.28             | -25.25 ±2.40             | -42.610 ±8.07             | -20.62 ±0.90             | -54.93 ±3.01              | 0.99998             |
| SM20-OX-1   | 0.33 ±0.02              | 14.82 ±0.26             | -29.95 ±2.49             | -57.89 ±8.37              | -20.50 ±1.42             | -54.99 ±4.77              | 0.99998             |
| SM30-OX-1   | 0.43 ±0.02              | 13.82 ±0.26             | -32.03 ±1.17             | -64.42 ±3.93              | -21.14 ±1.51             | -56.22 ±5.09              | 0.99997             |
| SM40-OX-1   | 0.60 ±0.02              | 10.29 ±0.17             | -34.09 ±2.13             | -69.71 ±7.16              | -20.26 ±1.18             | -51.61 ±3.96              | 0.99997             |
| SM50-OX-1   | 0.64 ±0.02              | 7.13 ±0.11              | -41.79 ±2.16             | -90.90 ±7.26              | -22.92 ±1.29             | -56.96 ±4.33              | 0.99989             |
| SM60-OX-1   | 0.84 ±0.03              | 4.15 ±0.10              | -42.44 ±9.19             | -91.78 ±30.4              | -26.51 ±3.85             | -66.55 ±13.12             | 0.99951             |
| SM70-OX-1   | 0.83 ±0.02              | 3.42 ±0.03              | -39.27 ±0.19             | -77.87 ±0.64              | -27.50 ±0.64             | -66.73 ±2.16              | 0.99975             |
| SM80-OX-1   | 0.88 ±0.02              | 3.45 ±0.05              | -38.16 ±1.54             | -74.20 ±5.17              | -26.89 ±1.92             | -65.54 ±6.46              | 0.9996              |

**Table S4.** Henry's constants for CO<sub>2</sub> and N<sub>2</sub> at 30 °C and resulting Henry's selectivity.

|             | $k_{\text{CO}_2}$<br>(mmol/g*bar) | $k_{\text{N}_2}$<br>(mmol/g*bar) | $S^{\text{Henry's}}$<br>(-) |
|-------------|-----------------------------------|----------------------------------|-----------------------------|
| SM0-PYRO    | 8.91                              | 0.399                            | 22                          |
| SM20-PYRO   | 19.9                              | 0.294                            | 68                          |
| SM40-PYRO   | 21.5                              | 0.185                            | 117                         |
| SM60-PYRO   | 23.9                              | 0.242                            | 98                          |
| SM80-PYRO   | 22.4                              | 0.199                            | 113                         |
| SM0-OX-0.5  | 10.1                              | 0.580                            | 17                          |
| SM10-OX-0.5 | 8.73                              | 0.581                            | 15                          |
| SM20-OX-0.5 | 10.9                              | 0.367                            | 30                          |
| SM30-OX-0.5 | 13.0                              | 0.358                            | 36                          |
| SM40-OX-0.5 | 13.7                              | 0.283                            | 49                          |
| SM50-OX-0.5 | 17.7                              | 0.247                            | 72                          |
| SM60-OX-0.5 | 19.5                              | 0.222                            | 88                          |
| SM70-OX-0.5 | 22.0                              | 0.178                            | 124                         |
| SM80-OX-0.5 | 20.9                              | 0.134                            | 156                         |
| SM0-OX-1    | 11.5                              | 0.508                            | 23                          |
| SM10-OX-1   | 4.79                              | 0.444                            | 11                          |
| SM20-OX-1   | 4.53                              | 0.332                            | 14                          |
| SM30-OX-1   | 5.25                              | 0.333                            | 16                          |
| SM40-OX-1   | 6.62                              | 0.286                            | 23                          |
| SM50-OX-1   | 9.94                              | 0.188                            | 53                          |
| SM60-OX-1   | 13.1                              | 0.182                            | 72                          |
| SM70-OX-1   | 19.1                              | 0.146                            | 130                         |
| SM80-OX-1   | 19.9                              | 0.171                            | 116                         |

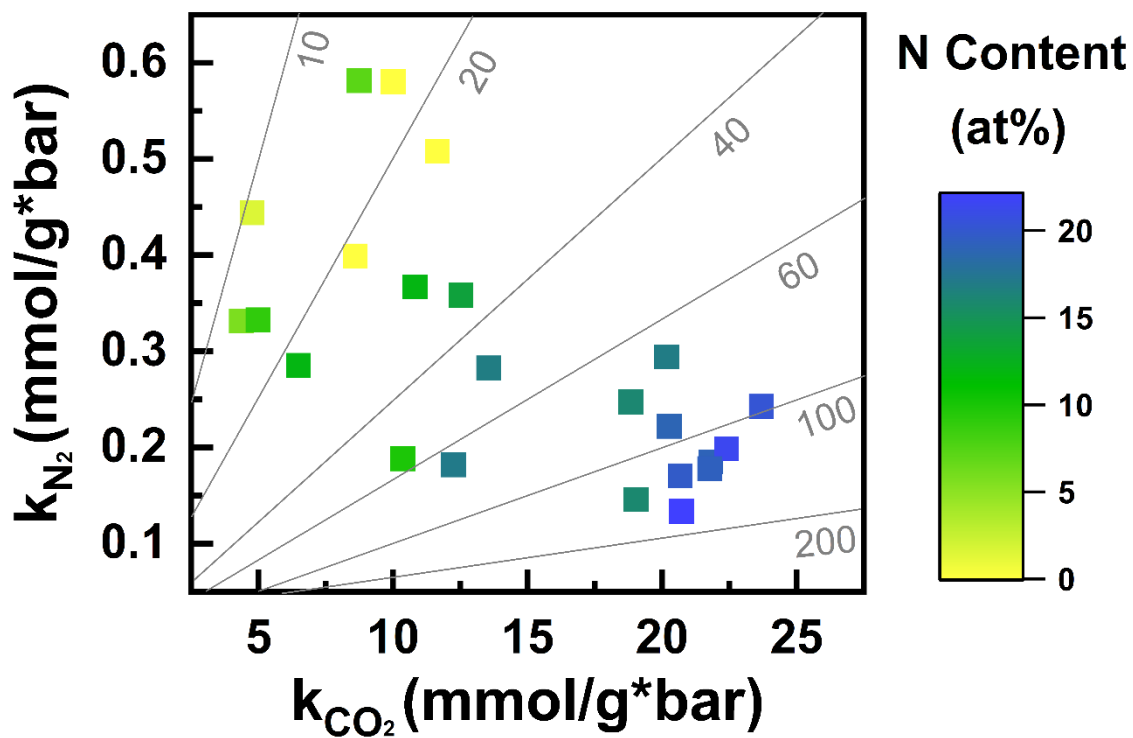

**Figure S6.** Comparison of Henry's constants for CO<sub>2</sub> and N<sub>2</sub>. Grey lines indicate Henry's selectivity.

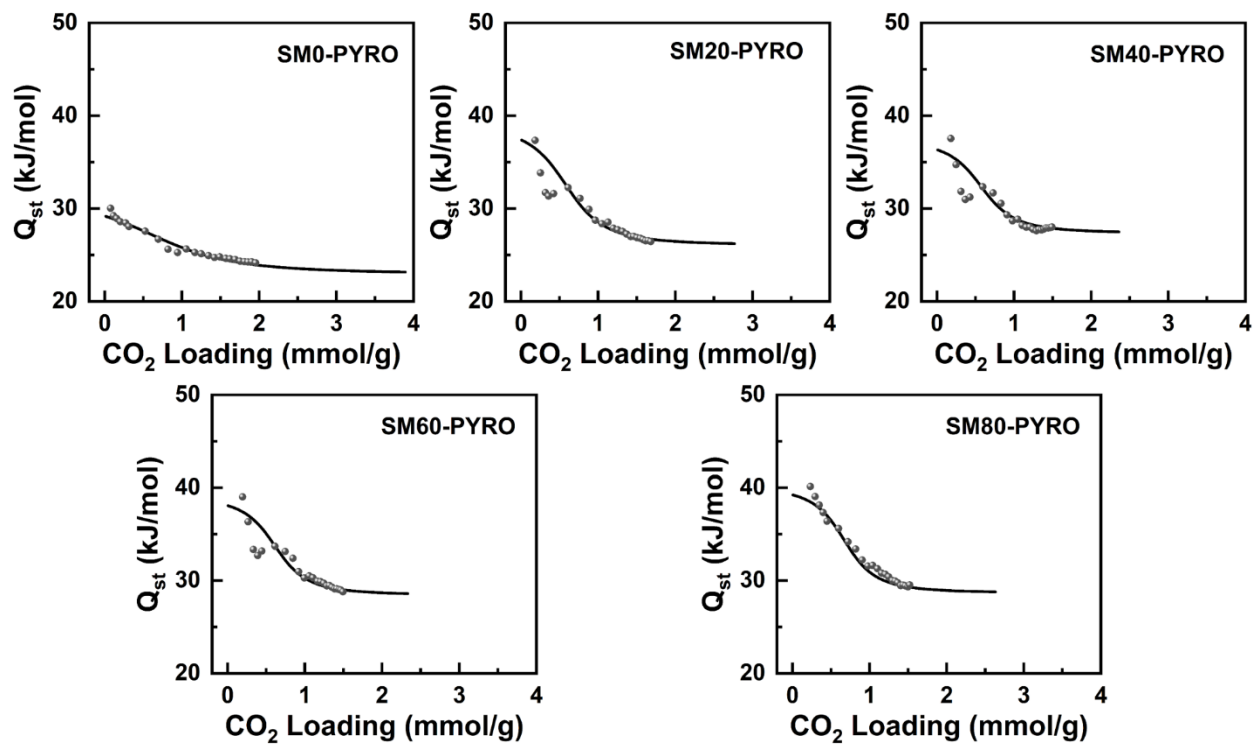

**Figure S7.** Comparison of analytical (lines) vs. numerically-derived (symbols) isosteric heats of adsorption for pyrolyzed samples.

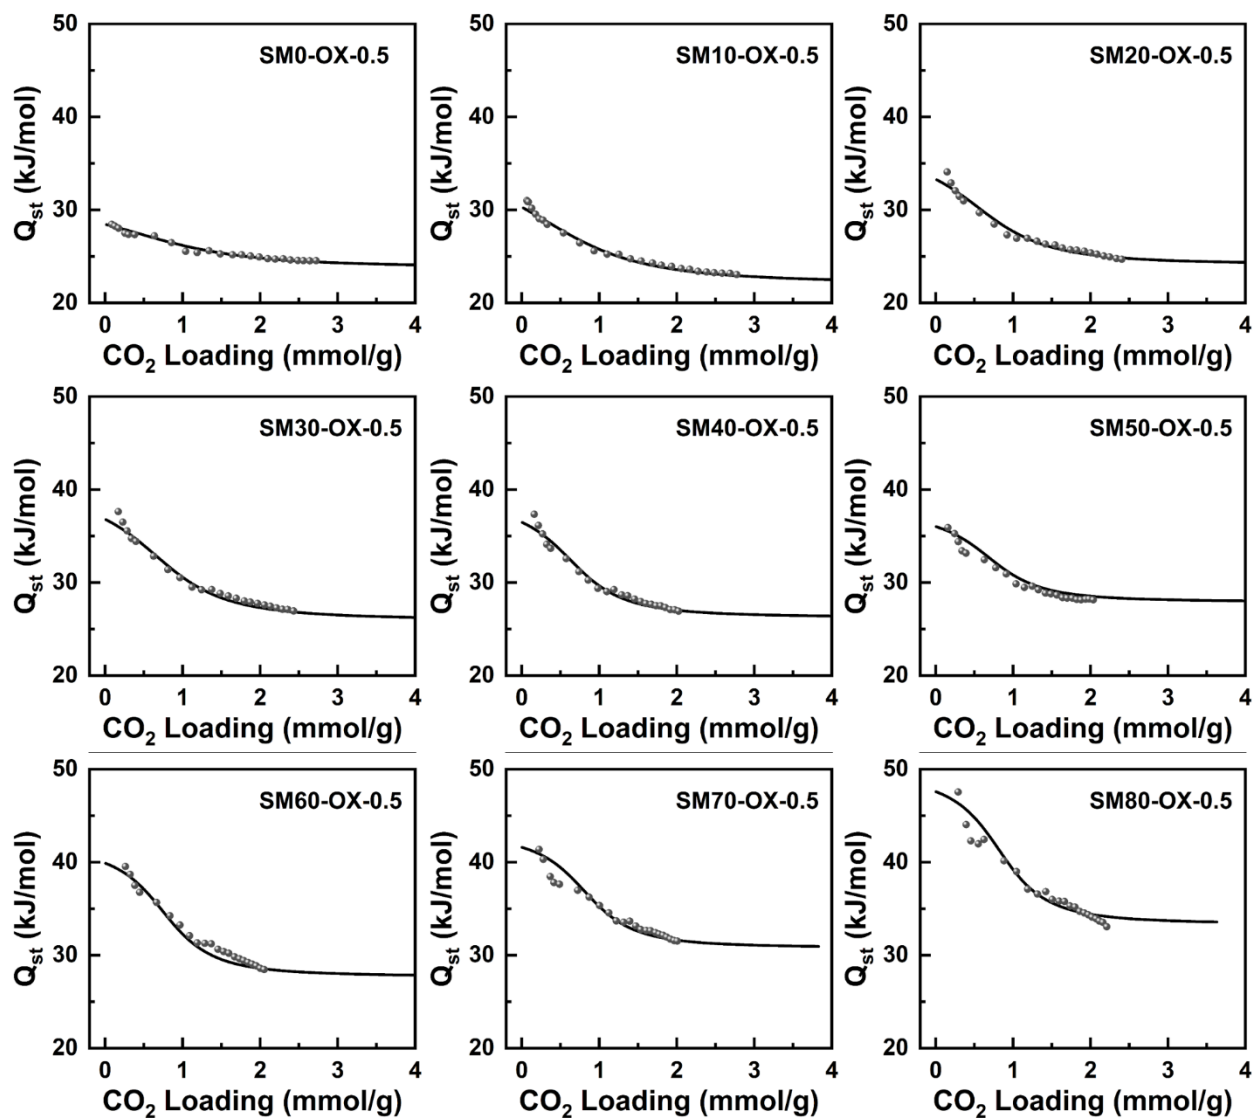

**Figure S8.** Comparison of analytical (lines) vs. numerically-derived (symbols) isosteric heats of adsorption for activated SMx-OX-0.5 samples.

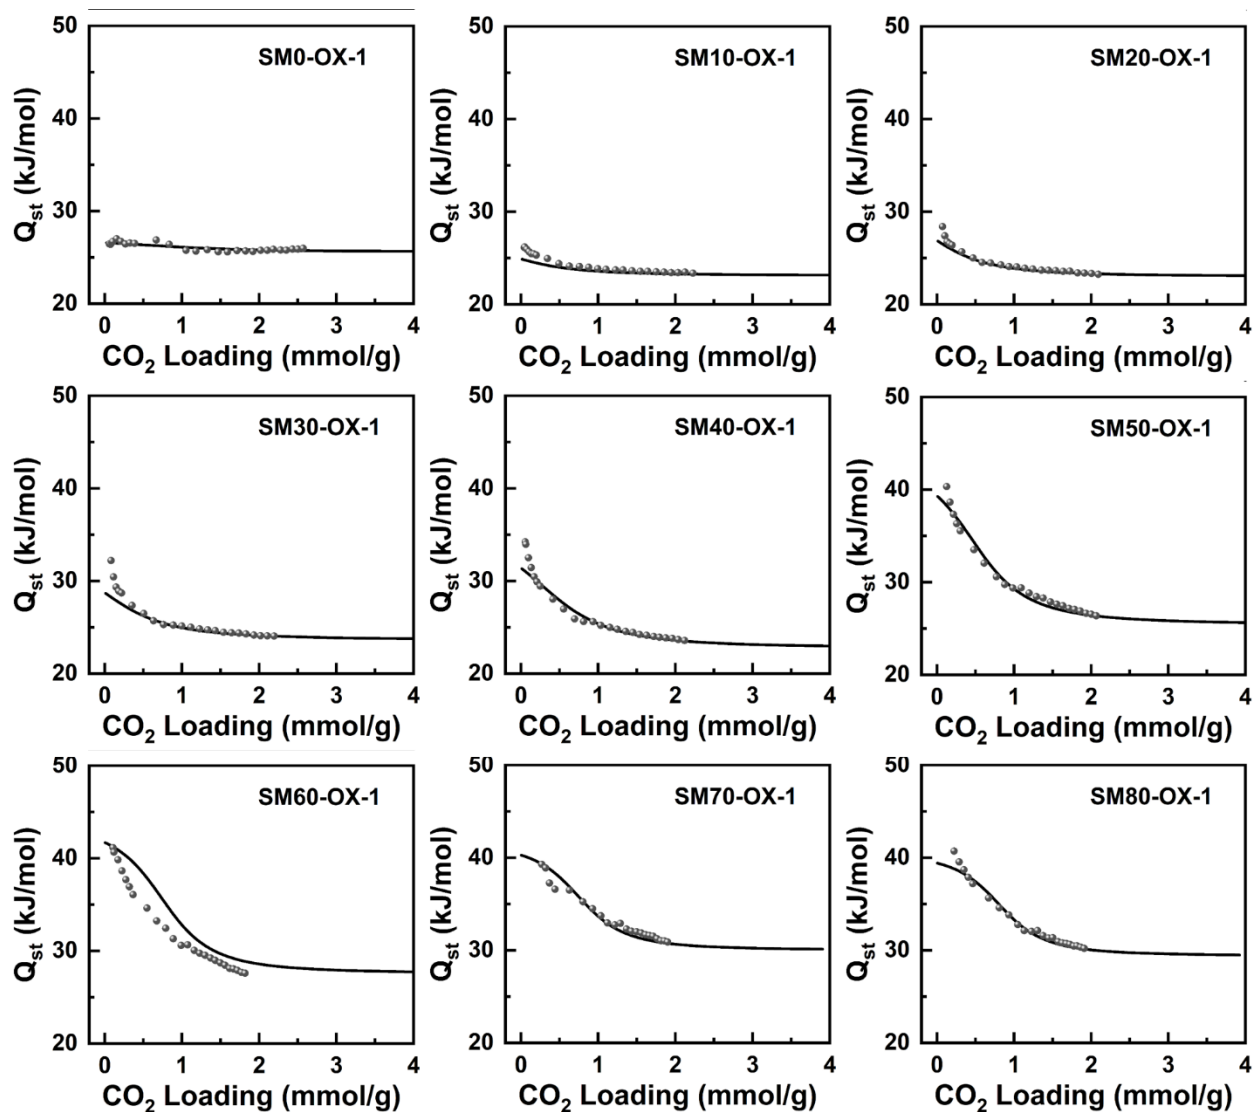

**Figure S9.** Comparison of analytical (lines) vs. numerically-derived (symbols) isosteric heats of adsorption for activated SMx-OX-1 samples.

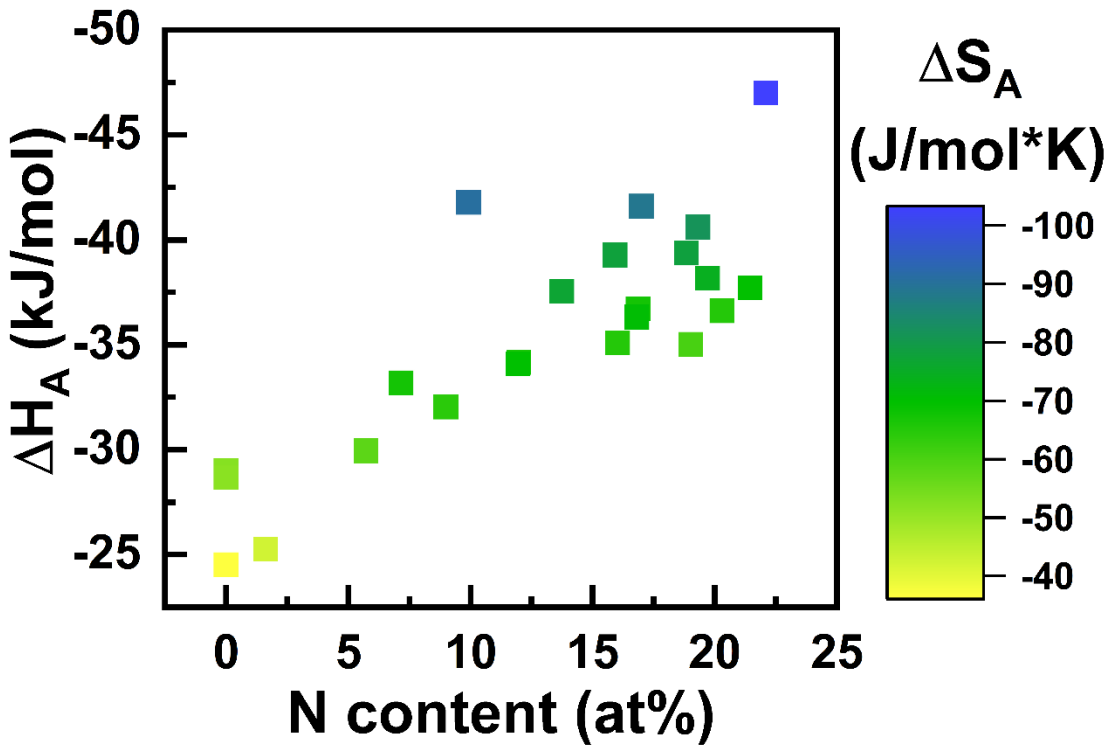

**Figure S10.** At a given N content, increases in the magnitude of entropy loss upon adsorption (most likely associated with confinement; heat map) resulted in increased enthalpy gained upon adsorption.



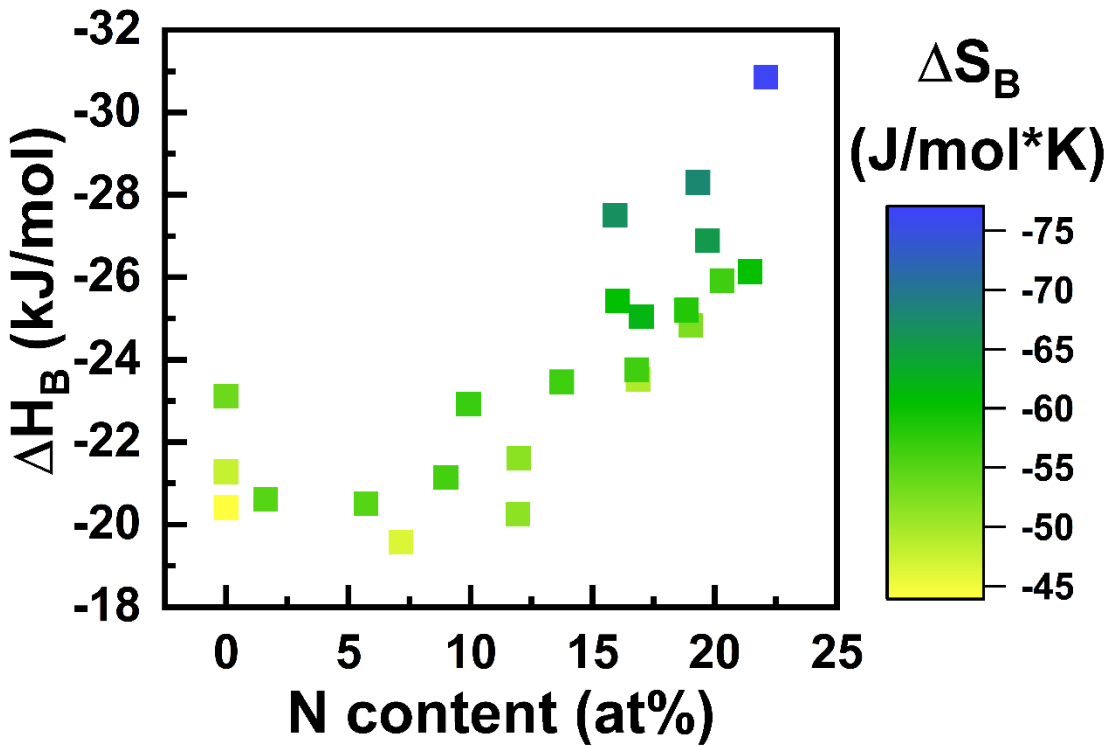

**Figure S11.** At a given N content, increases in the magnitude of entropy loss upon adsorption (most likely associated with confinement; heat map) resulted in increased enthalpy gained upon adsorption.

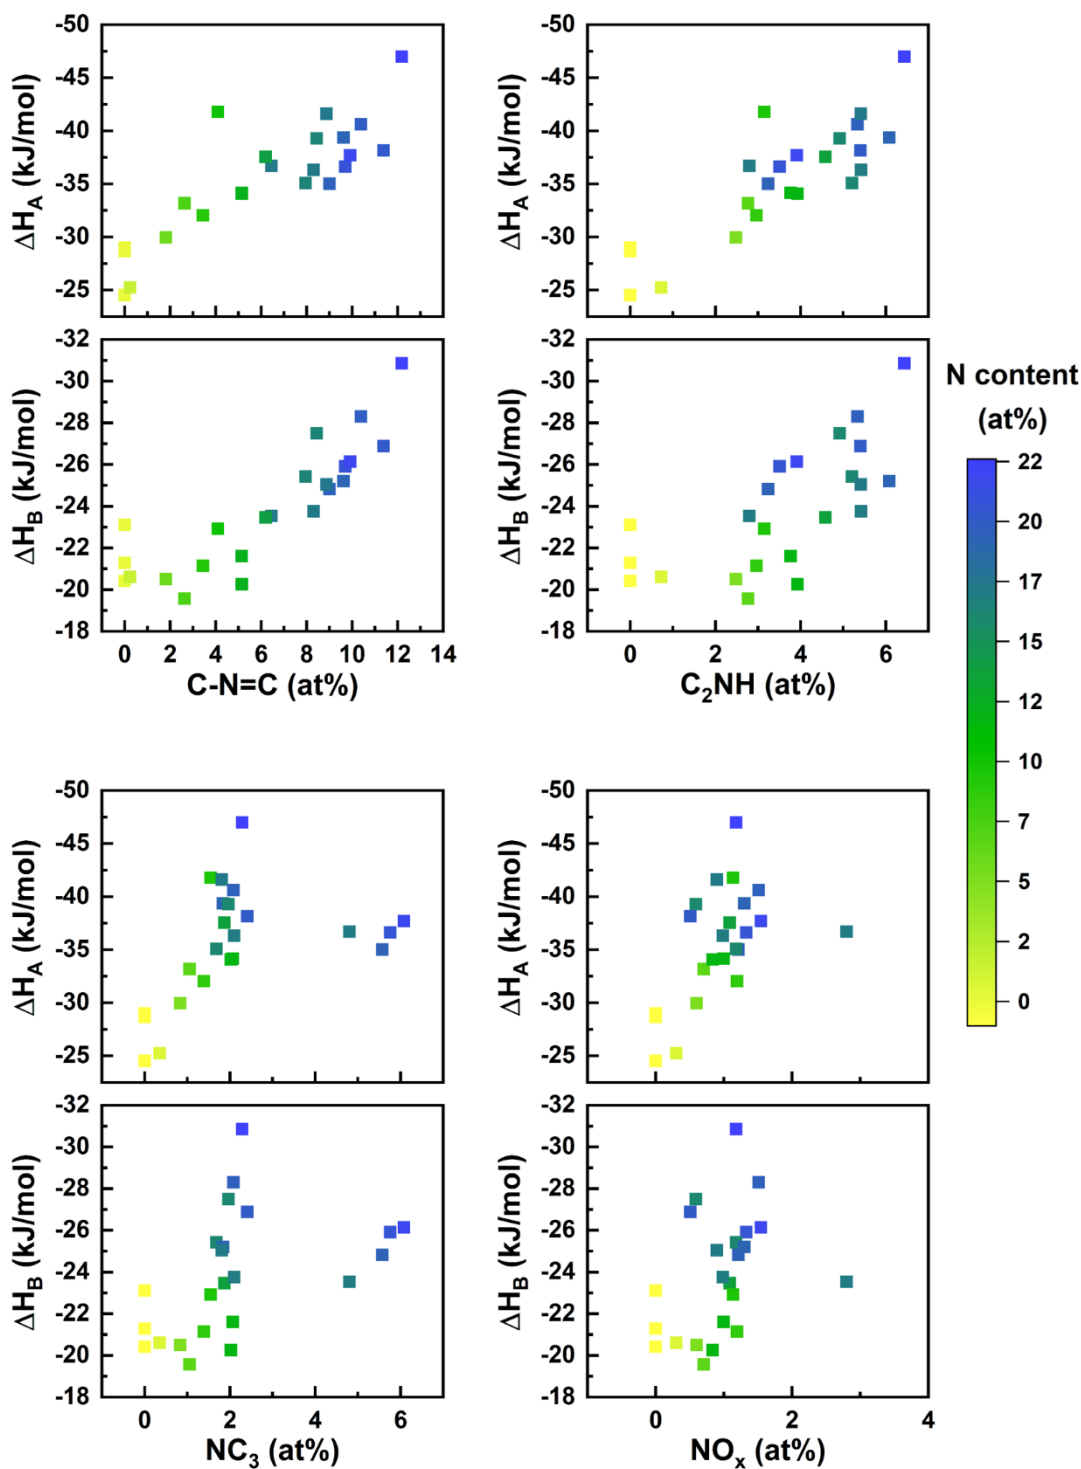

**Figure S12.** Correlations between different N functionalities present on the carbons' surfaces (as determined by XPS) and the observed enthalpies of adsorption for both the strong (A) and weak (B) site. Overall, it seems that pyridinic N (C-N=C, top left) has the largest relative effect on increasing the adsorptive affinity for CO<sub>2</sub>, followed by pyrrolic (C<sub>2</sub>NH, top right), then graphitic (NC<sub>3</sub>, bottom left), then oxidized N species (NO<sub>x</sub>, bottom right).

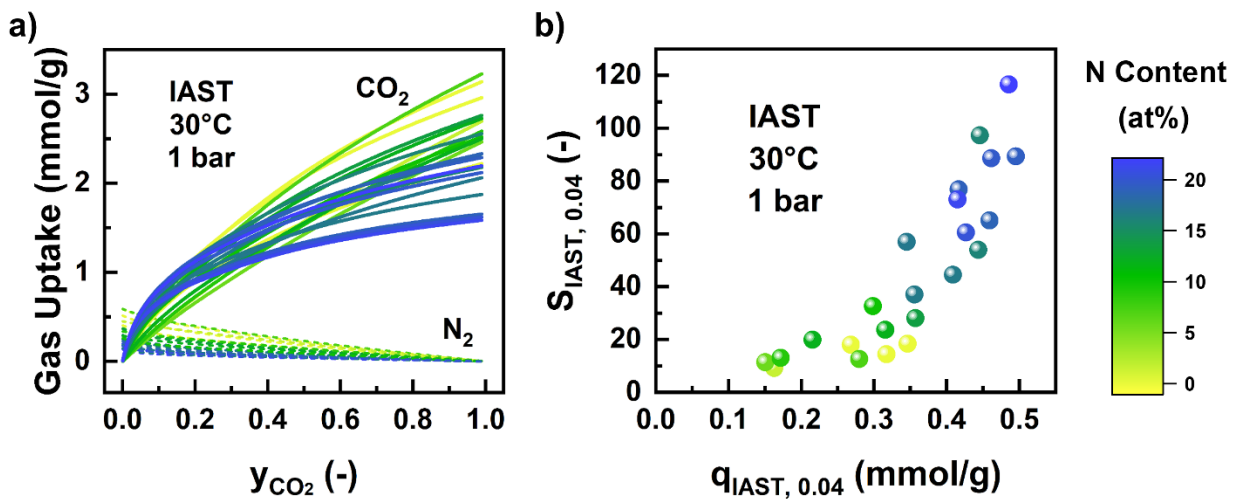

**Figure S13.** IAST predictions as quantified by a) binary isotherms and b) estimated CO<sub>2</sub> capacity and selectivity for a feed with 4% CO<sub>2</sub> at 30 °C and 1 bar of total pressure.

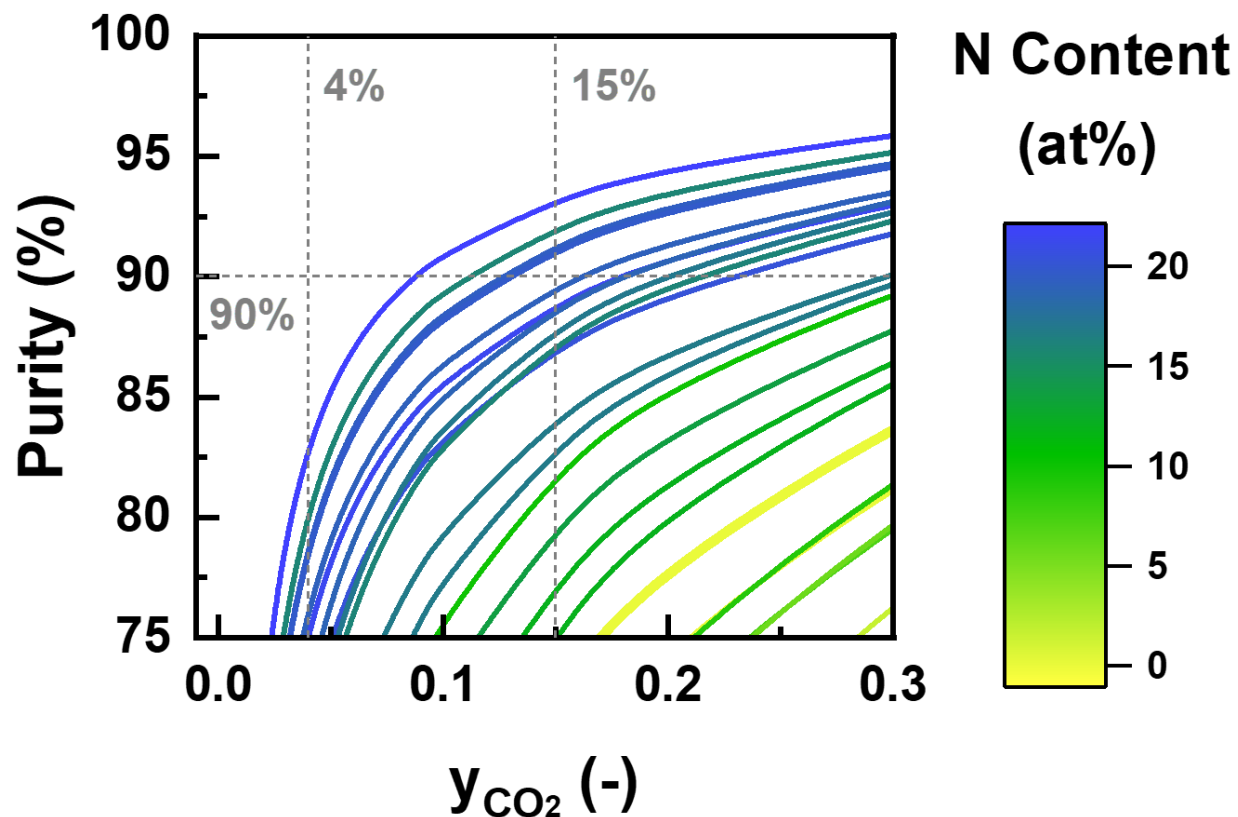

**Figure S14.** A zoomed-in purity plot focusing on the purity and concentration ranges of interest for practical implementation of carbon capture. Predictions by IAST at 30 °C for a binary feed of CO<sub>2</sub> and N<sub>2</sub> at 1 bar total pressure.

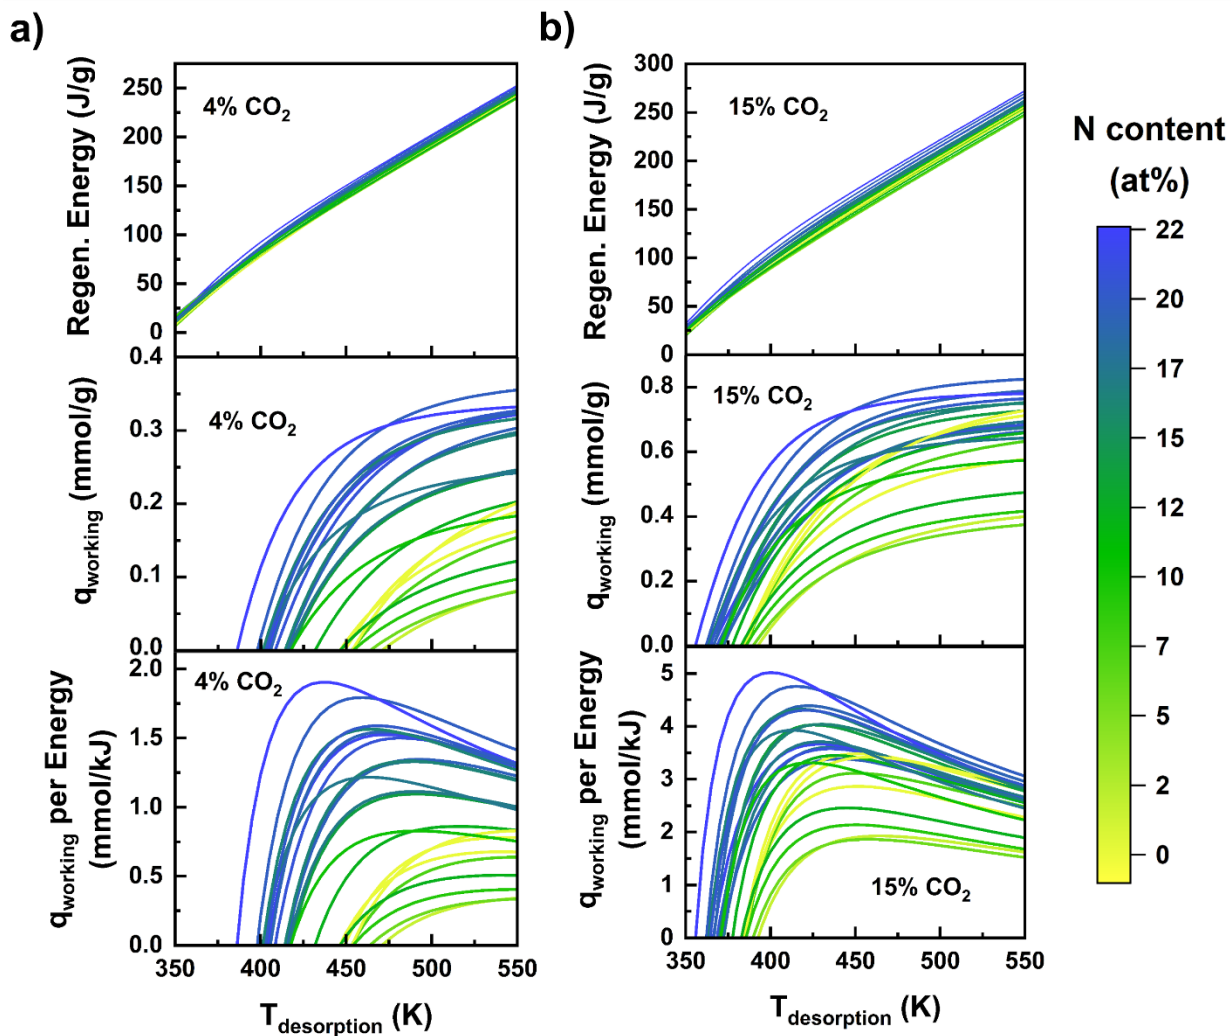

**Figure S15.** Predicted regeneration energy (top), working capacity (middle), and figure of merit – working capacity per energy (bottom) for a simplified TSA process considering a feed with a) 4% and b) 15% CO<sub>2</sub>.

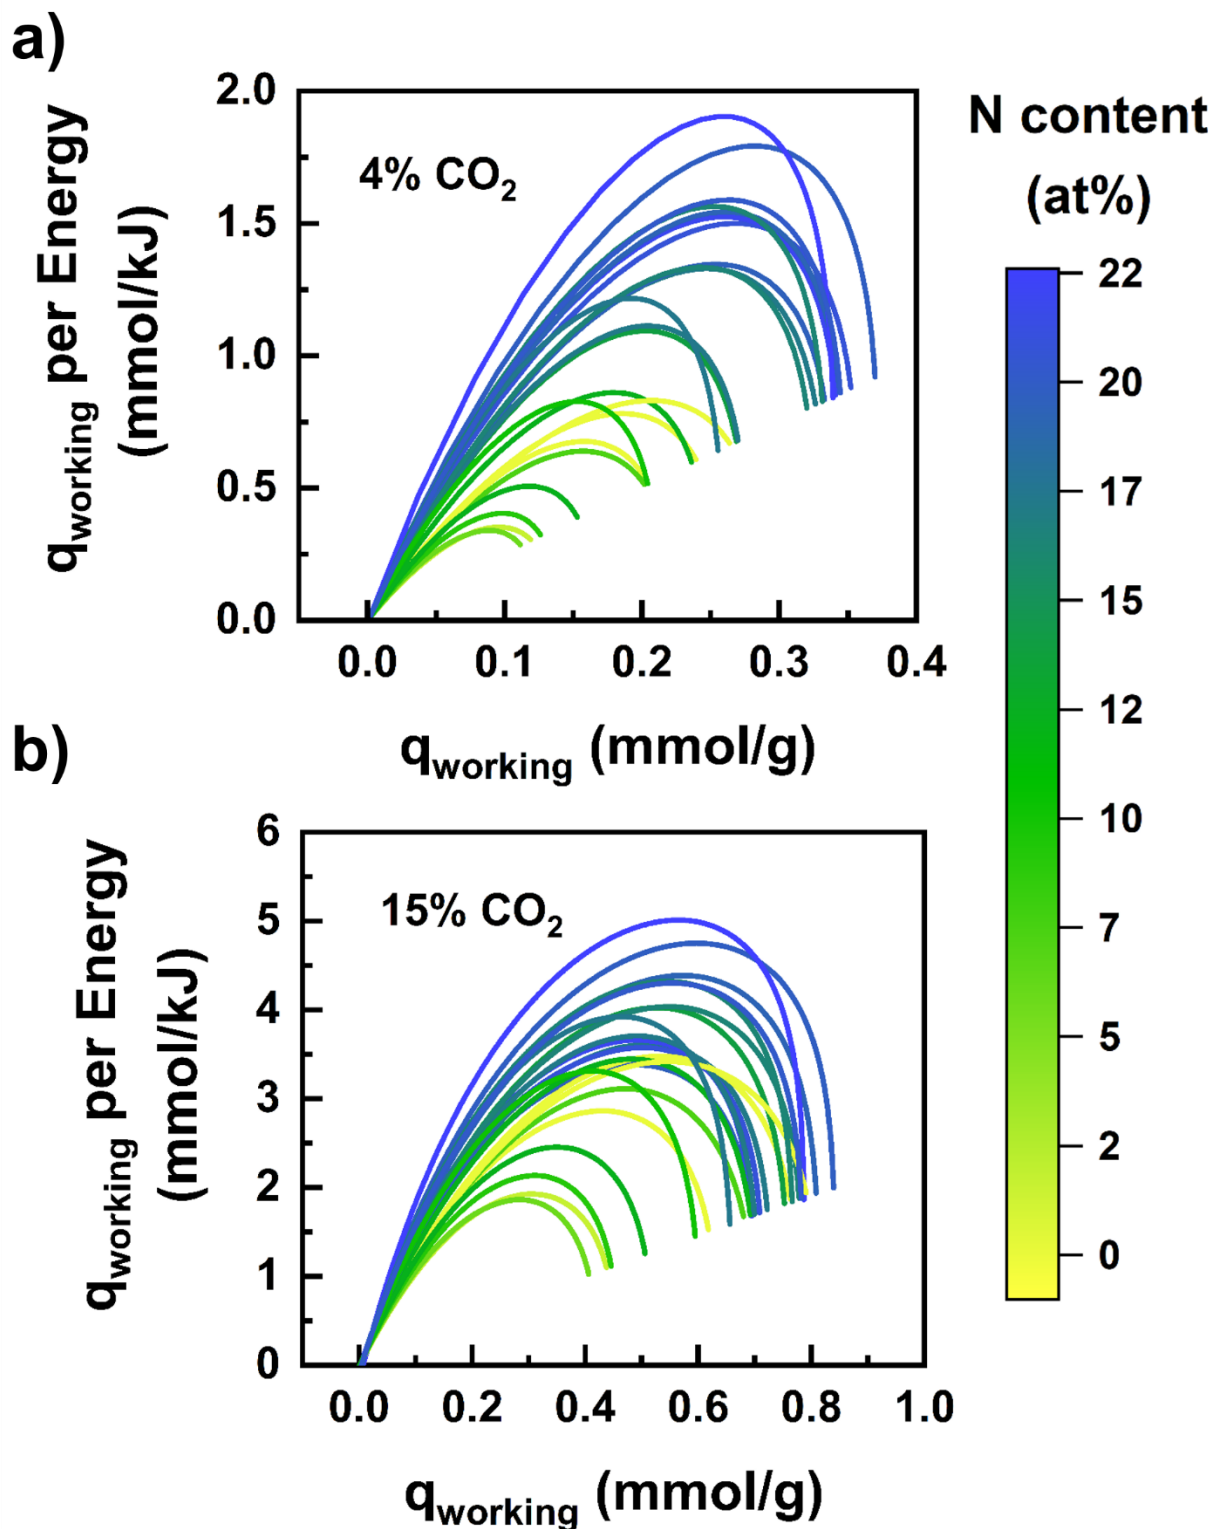

**Figure S16.** Curves representing the achievable combinations of working capacity and working capacity per energy, showing how for each of the CO<sub>2</sub> feed stream under consideration (4%, a; 15%, b), an optimal regeneration temperature exists.

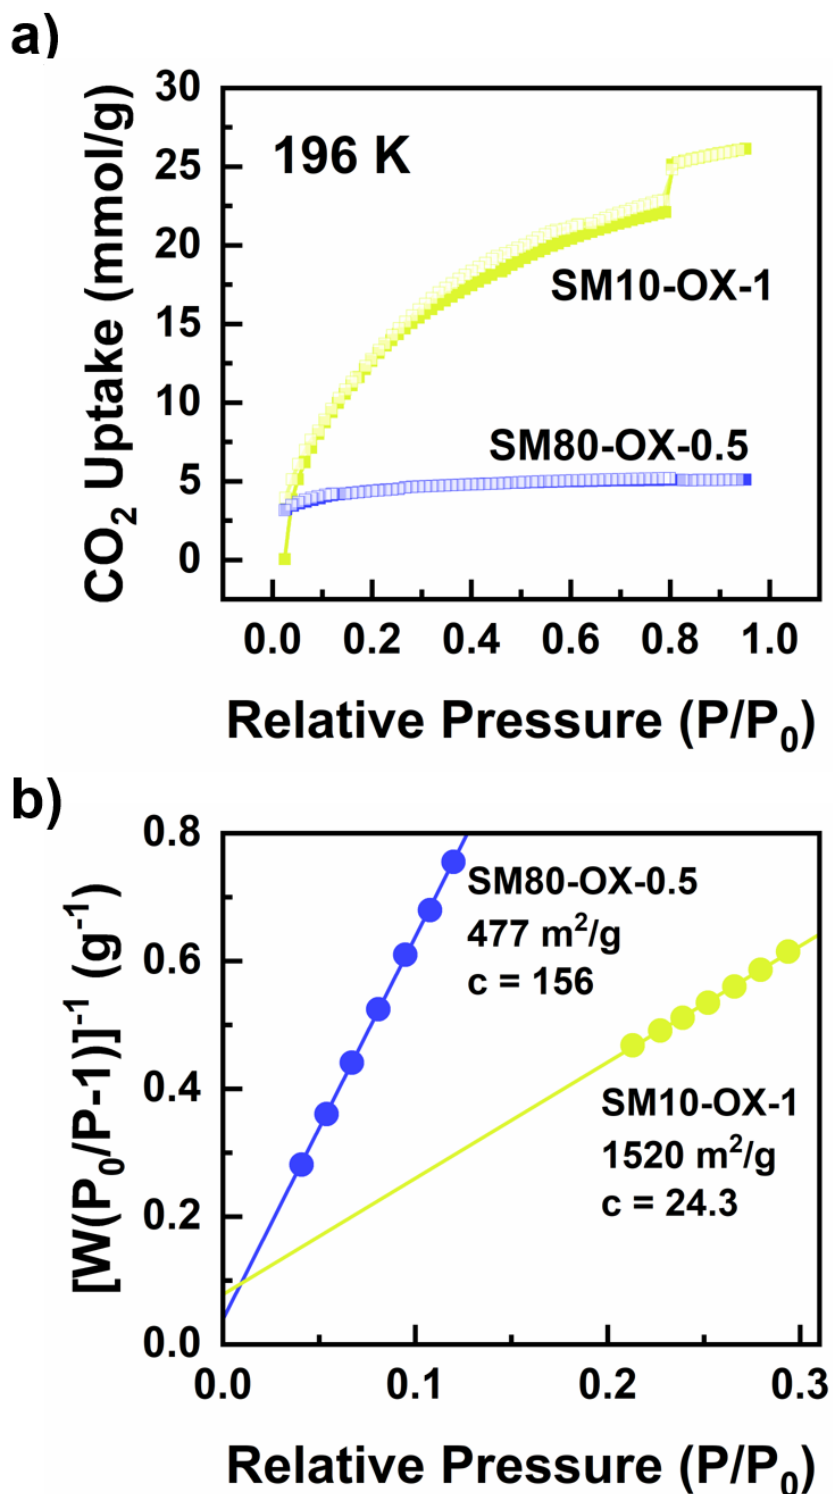

**Figure S17.** a) Isotherms and b) BET analysis of an N-rich sample (SM80-OX-0.5, blue) and an N-poor sample (SM10-OX-1, yellow) employing CO<sub>2</sub> (instead of N<sub>2</sub>) as an adsorbate/probe molecule at 195 K.
